# Supplementary material for: Identification of environmentally stable QTLs controlling Saponin content in Glycine max
Source: PubMed Central journal article supplement — Breed Sci. 2017 Mar 4;67(2):123–8. doi: 10.1270/jsbbs.16086 (PMC5445963; doi:10.1270/jsbbs.16086), 2017-03-04
Supplement: 67_16086_2.pdf [file 67_16086_2.pdf]

Supplemental Table1. Summary of the QTL for flowering time and seed weight detected in PT-RILs harvested at Kyoto using simple interval mapping method

|                | Marker interval flanking QTL peak<br>(marker position cM) | Chr.<br>(linkage group) | Highest<br>LOD | Marker with highest LOD<br>(marker position cM) | Effective allele        |
|----------------|-----------------------------------------------------------|-------------------------|----------------|-------------------------------------------------|-------------------------|
| Flowering time | Satt277(90.3)-Satt460(95.7)                               | 6(C2)                   | 7.3            | Satt134(93.6)                                   | Peking(early flowering) |
| Seed weight    | Sat_162(47.6)-Satt424(56.5)                               | 8(A2)                   | 8.5            | Sat_215(51.9)                                   | Tamahomare(heavy)       |
