# Supplementary figures and images for: Identification of environmentally stable QTLs controlling Saponin content in Glycine max
Source: PubMed Central journal article supplement — Breed Sci. 2017 Mar 4;67(2):123–8. doi: 10.1270/jsbbs.16086 (PMC5445963; doi:10.1270/jsbbs.16086), 2017-03-04

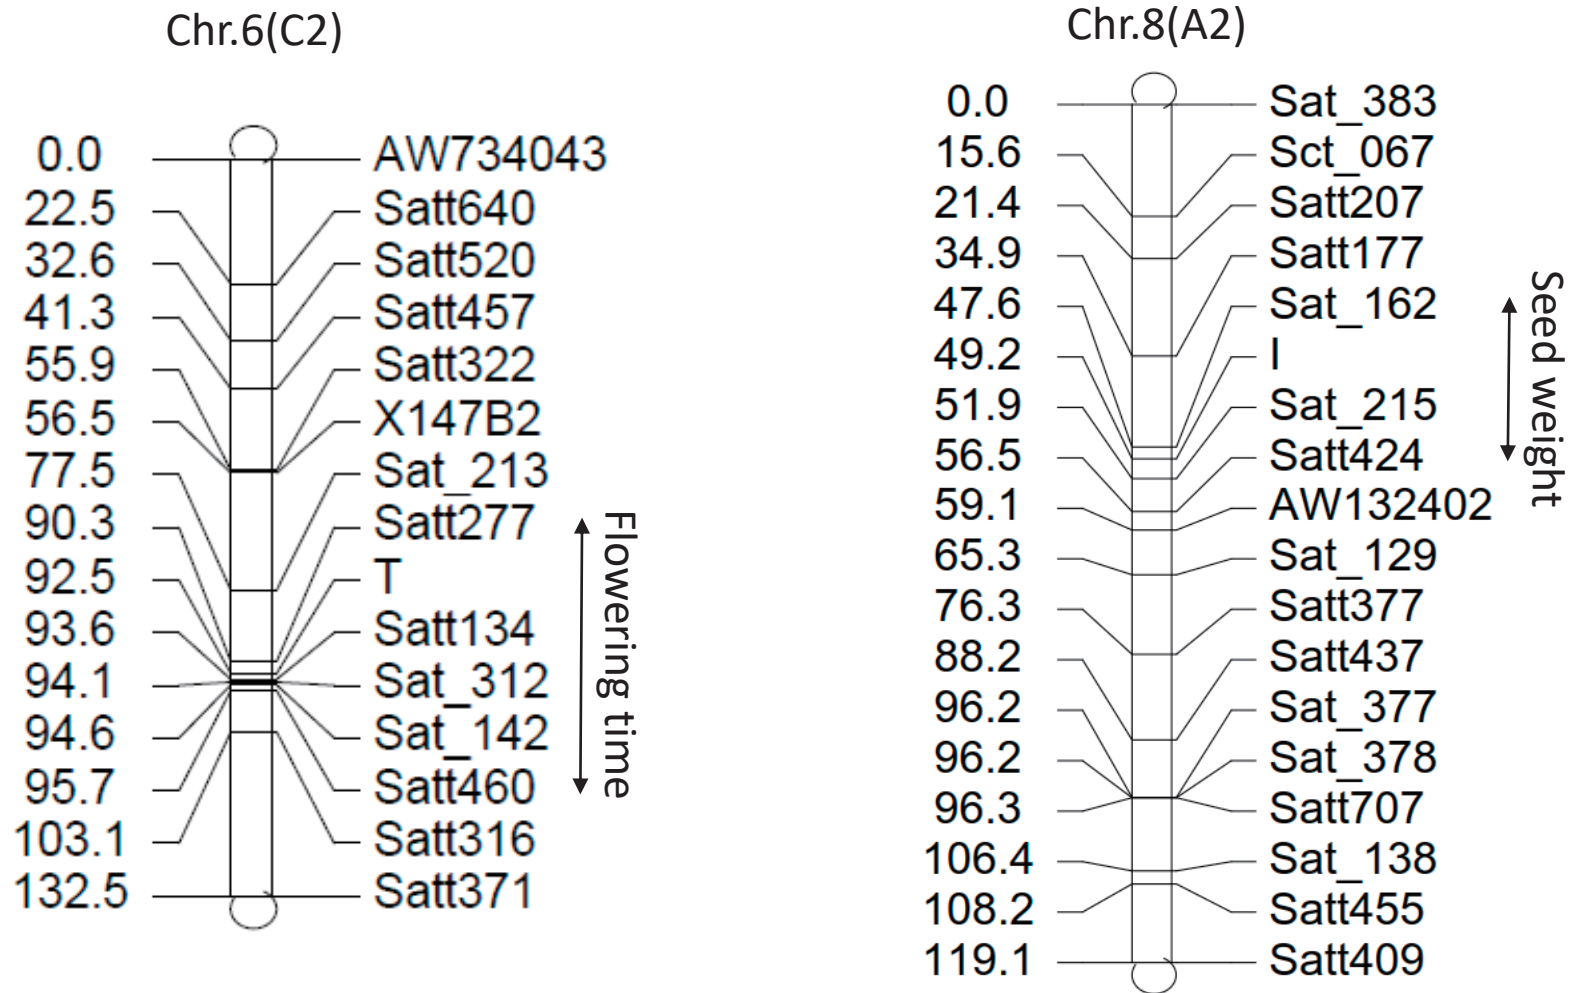

Supplemental Fig.1. Genomic locations of QTL for flowering time and seed weight.

Supplement: 67_16086_1.pdf [file 67_16086_1.pdf]
